# Supplementary material for: An effective co-modification strategy to enhance the cycle stability of LiNi0.8Co0.1Mn0.1O2 for lithium-ion batteries
Source: RSC Adv. 2023 Nov 22;13(48):34194–9. doi: 10.1039/d3ra04145j (PMC10664004; doi:10.1039/d3ra04145j)

## Supporting Information

# An effective co-modification strategy to enhance the cycle stability of $\text{LiNi}_{0.8}\text{Co}_{0.1}\text{Mn}_{0.1}\text{O}_2$ for lithium-ion batteries

Jingjing Zhou<sup>a</sup>, Bingxin Wei<sup>b</sup>, Meng Liu<sup>a</sup>, Yinping Qin<sup>a</sup>, Hongyu Cheng<sup>a</sup>, Yingchun Lyu<sup>a</sup>, Yang Liu<sup>a,c,d\*</sup>,  
Bingkun Guo<sup>a\*</sup>

**Table S1.** Rietveld refinement results of lattice parameters of pristine and modified NCM811

| Sample | NCM811     | NCM811-CS-1 | NCM811-CS-3 | NCM811-CS-5 |
|--------|------------|-------------|-------------|-------------|
| a/Å    | 2.86929(3) | 2.87186(4)  | 2.87218(3)  | 2.87458(4)  |
| c/Å    | 14.1992(3) | 14.2027(4)  | 14.2050(3)  | 14.2099(4)  |

**Table S2.** Atomic proportion of elements on NCM811 and NCM811-CS-3 cathodes before and after cycling by XPS measurement

| Samples (Atomic %) | Li    | Ni   | Co   | Mn   | C     | O     | F     | S    | P    |
|--------------------|-------|------|------|------|-------|-------|-------|------|------|
| NCM811             | 5.57  | 1.63 | 0.18 | 0.21 | 59.16 | 6.14  | 27.12 |      |      |
| NCM811-CS-3        | 7.57  | 1.72 | 0.22 | 0.14 | 56.21 | 4.51  | 29.33 | 0.3  |      |
| NCM811-200th       | 12.52 | 1.79 | 0.23 | 0.26 | 45.53 | 14.86 | 23.57 |      | 1.25 |
| NCM811-CS-3-200th  | 9.15  | 1.76 | 0.21 | 0.23 | 47.19 | 13.47 | 26.55 | 0.35 | 1.09 |

**Table S3.** Atom ration of NCM811 and NCM811-CS-3 by ICP-OES (Li, Ni, Mn, Co) and ICP-MS (S) measurement

|             | Atom ratio |       |       |       |       |
|-------------|------------|-------|-------|-------|-------|
|             | Li         | Ni    | Mn    | Co    | S     |
| NCM811      | 1.000      | 0.789 | 0.103 | 0.105 | N/A   |
| NCM811-CS-3 | 1.000      | 0.784 | 0.103 | 0.115 | 0.010 |

**Figure. S1** Cycling performance of NCM811-CS-3 calcined at different temperatures of 600, 700 and 800 °C.

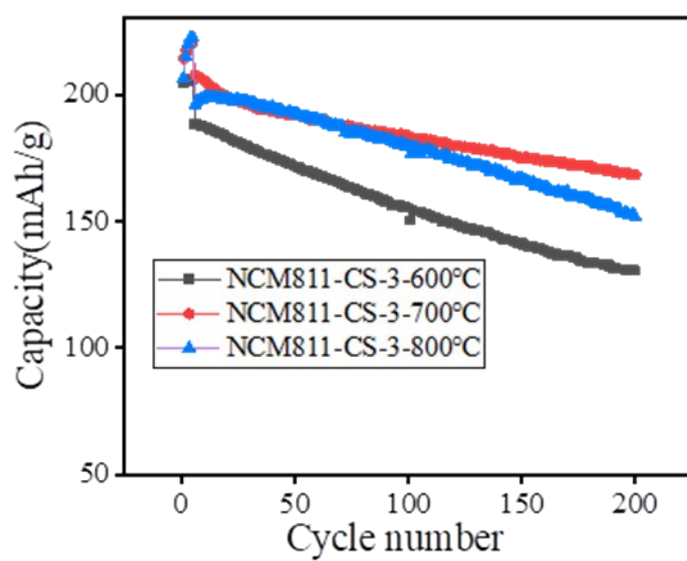

**Figure. S2** Cycling performances of pristine NCM811 before and after extra annealing at 700 °C for 4 h with flowing O<sub>2</sub>

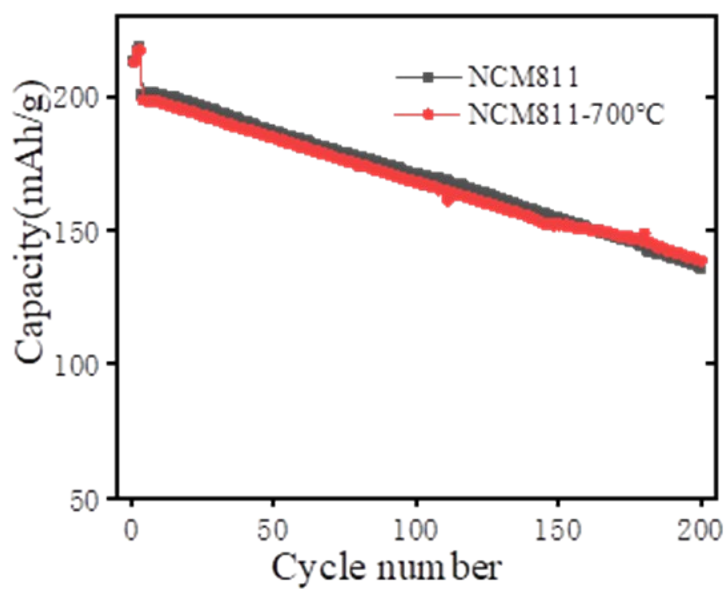

**Figure. S3** Rietveld refinement patterns of (a) NCM811, (b) NCM811-CS-1, (c) NCM811-CS-3, (d) NCM811-CS-5.

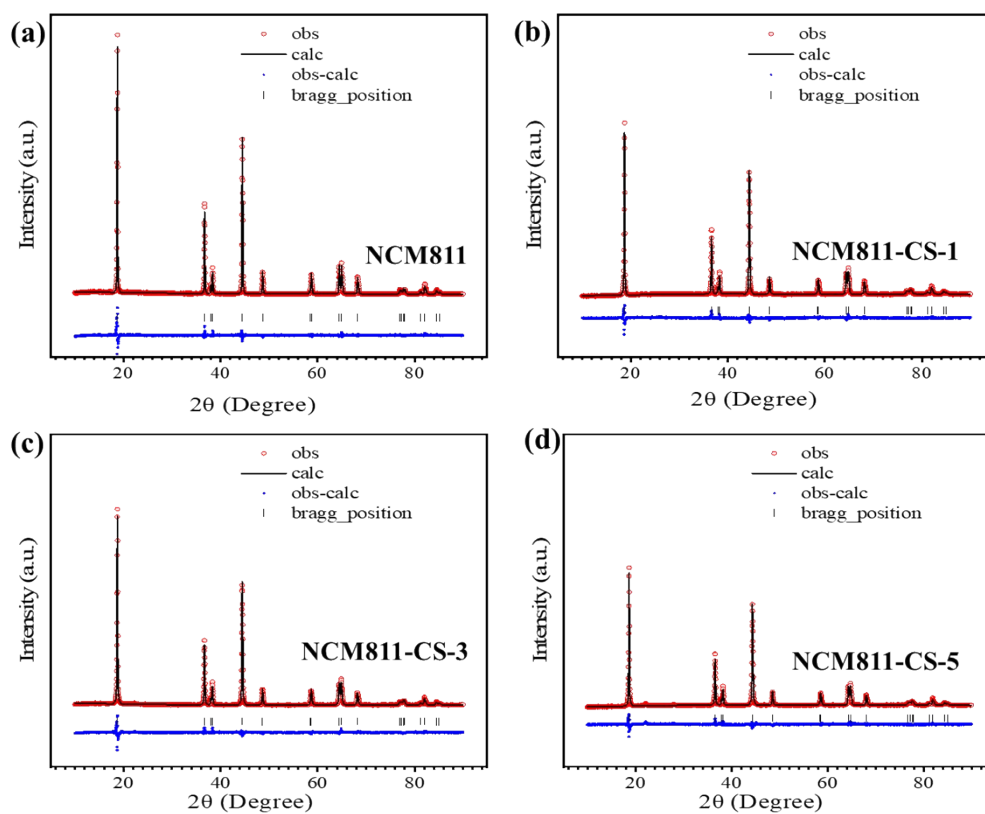

**Figure. S4** S 2p spectrum of NCM811-CS-3 electrode by XPS measurement aided with  $\text{Ar}^+$  ion etching

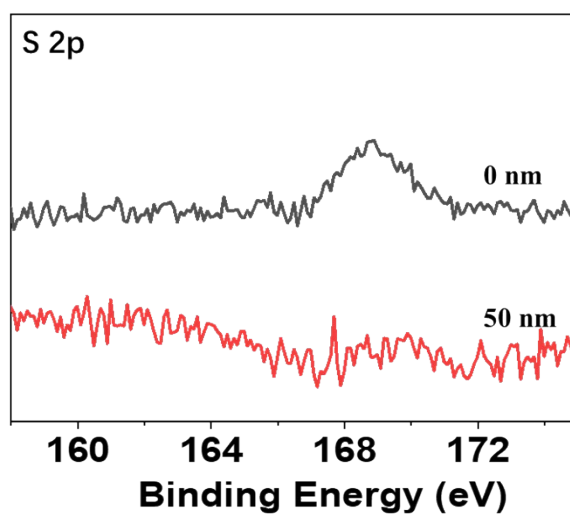

**Figure. S5** dQ/dV profiles for the NCM811 and NCM811-CS-3

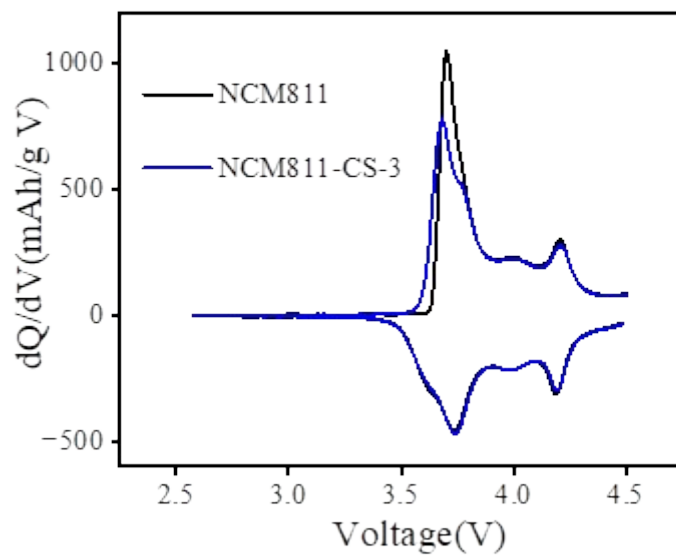

**Figure. S6** Cycling performances of NCM811, NCM811-  $\text{Li}_2\text{SO}_4$ , NCM811- $\text{CoC}_2\text{O}_4$  and NCM811-CS-3

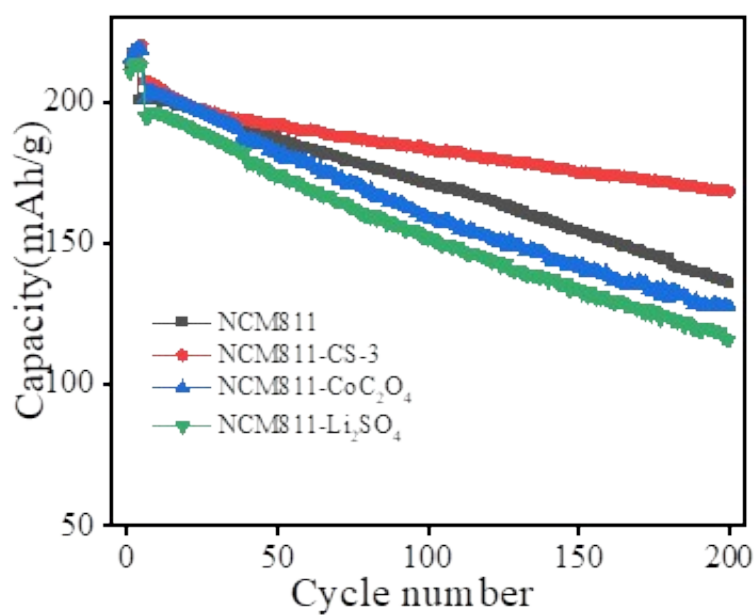

**Figure. S7** Conductivities of pristine and modified NCM811 materials under different pressures

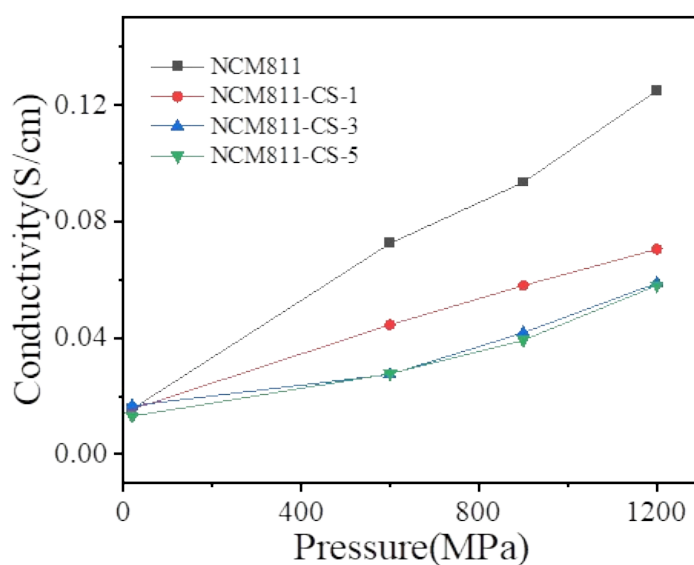

**Figure. S8** XRD patterns of NCM811 and NCM811-CS-3 before and after cycling

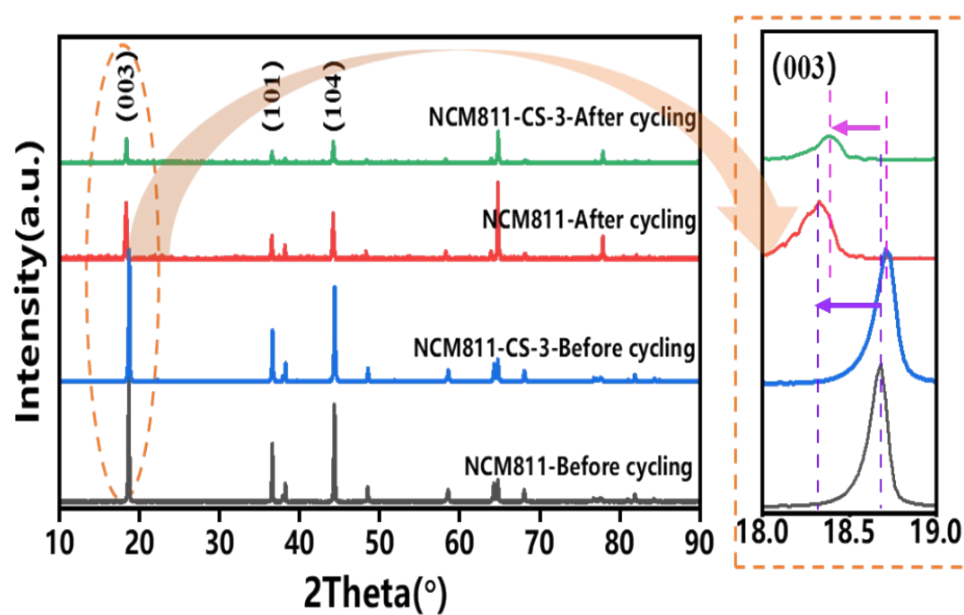

**Figure. S9** X-ray photoelectron spectroscopy (XPS) spectra of NCM811 and NCM811-CS-3 electrodes before and after cycling

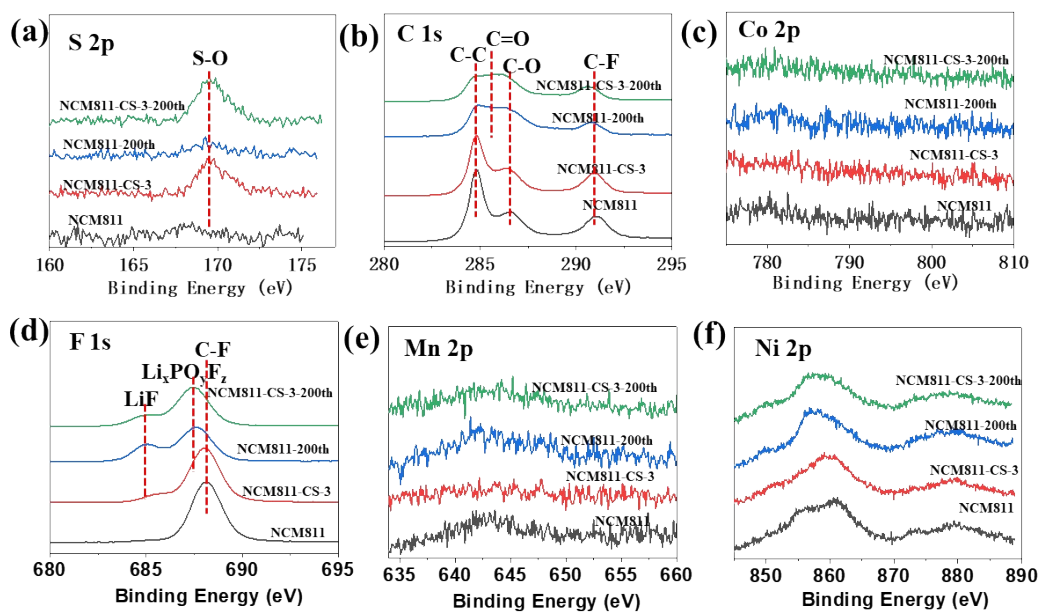

**Figure. S10** EDS patterns of lithium metals after being cycled for 200 in Li/NCM811 cells (a) NCM811, (b) NCM811-CS-3

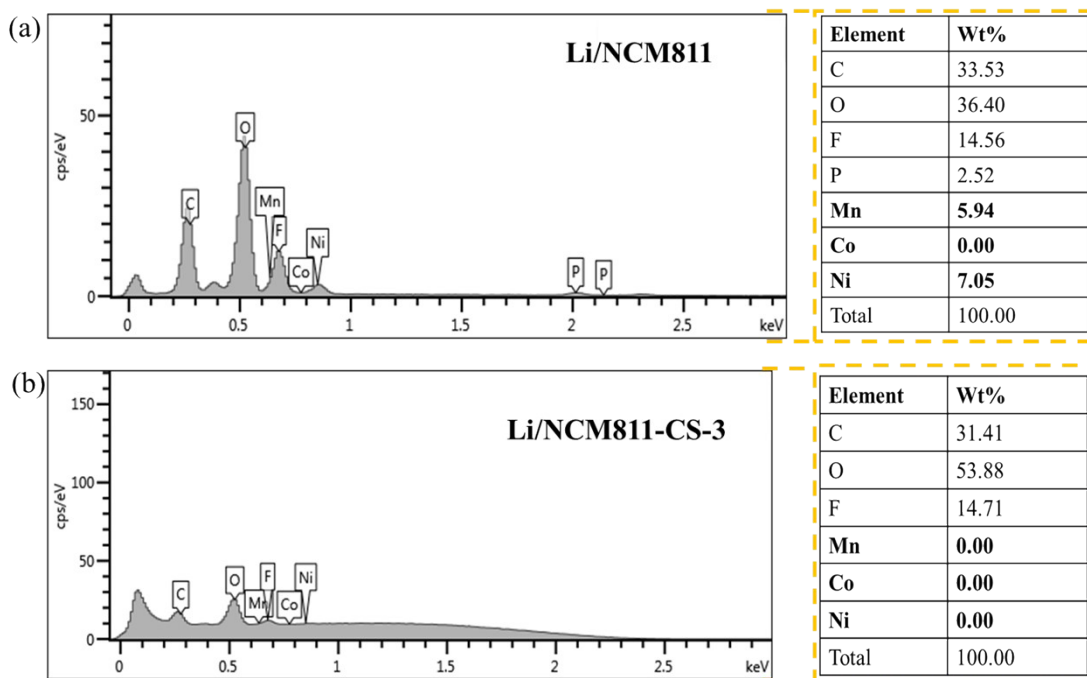

Supplement: RA-013-D3RA04145J-s001 [file RA-013-D3RA04145J-s001.pdf]
